# Supplementary material
Source: Springer Nature journal article supplement (https://www.springermedizin.de/resource/supplementary/12913_2014_3467_MOESM3_ESM.pdf/9532936)
Supplement: MOESM3 [file 9532936]

### Additional file 3: Coding nodes

|                                               | Nodes                     | Sub Nodes                                                                                                                                |
|-----------------------------------------------|---------------------------|------------------------------------------------------------------------------------------------------------------------------------------|
| <b>Existing Conceptual Framework elements</b> | Broader Context           | Engagement<br>Influencing Other Activities<br>Participatory Learning<br>Perception of HIA<br>Understanding                               |
|                                               | Distal Impacts            |                                                                                                                                          |
|                                               | Inputs                    | Capacity and Experience<br>Organisational Arrangements<br>Proposal<br>Resources<br>Time                                                  |
|                                               | Parameters                | Decision-Makers<br>Decision-Making Processes<br>Type of HIA                                                                              |
|                                               | Process                   | Involvement of Decision-Makers and Stakeholders<br>Procedural Fidelity<br>Review<br>Trade-Offs<br>Transparency                           |
|                                               | Proximal Impacts          | Achieving Goals<br>Changes in Health Determinants<br>Changing Decisions and Implementation<br>Informing Decisions<br>Predictive Efficacy |
|                                               | Values, Purpose and Goals |                                                                                                                                          |

|                                            | Nodes                                                                                                                                                                                                                                                                                                                         | Sub Nodes                                                                                                                                                                               |
|--------------------------------------------|-------------------------------------------------------------------------------------------------------------------------------------------------------------------------------------------------------------------------------------------------------------------------------------------------------------------------------|-----------------------------------------------------------------------------------------------------------------------------------------------------------------------------------------|
| <b>Nodes that emerged from free coding</b> | Amenability to Change<br>Availability<br>Barriers<br>Changes during the HIA<br>Chaos<br>Cultural appropriateness<br>Demonstrating                                                                                                                                                                                             | Ambivalence<br>Annoyance<br>Comfortable<br>Concerned<br>Conflict<br>Considered<br>Criticism<br>Disappointment<br>Exclusion<br>Frustrated<br>Happy<br>Resistance<br>Support<br>Suspicion |
|                                            | Enablers<br>Equity Considerations in Planning<br>Evidence<br>Follow-Up<br>Improvements to HIA<br>Informed about what happened<br>Involvement of assessors<br>Memory<br>Nature of recommendations<br>Nature of report<br>Opportunities<br>Personalities<br>Planning vs HIA<br>Power<br>Prompt Debate<br>Rapid vs Comprehensive |                                                                                                                                                                                         |

| Nodes                     | Sub Nodes           |
|---------------------------|---------------------|
| Relationships             |                     |
| Subsequent changes        |                     |
| Successfulness            |                     |
| Taken Notice Of           |                     |
| Tangibility               |                     |
| Terms of Reference        |                     |
| Timing and Timeframes     |                     |
| Understanding at other    |                     |
| points in the HIA process |                     |
| Understanding of role     |                     |
| Volition                  | Someone else's idea |
